# Supplementary material for: Superacid-doped polyaniline as a soluble polymeric active electrolyte for supercapacitors
Source: Royal Society of Chemistry journal article supplement (doi:10.1039/d0sm00847h), 2020-01-01
Supplement: d0sm00847h1.pdf [file d0sm00847h1.pdf]

## **Supplementary Information**

# **Superacid-doped Polyaniline as a Soluble Polymeric Active Electrolyte for Supercapacitor**

Jingjing Wang,<sup>a</sup> Renhao Zheng,<sup>a</sup> Yuxin Chen,<sup>a</sup> Hua Bai,<sup>\*a</sup> and Tong-Yi Zhang<sup>\*b</sup>

<sup>a</sup> *College of Materials, Xiamen University, Xiamen, 361005, P. R. China.*

<sup>b</sup> *Materials Genome Institute, Shanghai University, Shanghai, 200444, P. R. China.*

\*Corresponding author

*E-mail address:* baihua@xmu.edu.cn (Hua Bai), Zhangty@shu.edu.cn (Tongyi Zhang).

## ***Experimental***

### ***Preparation of PANI solution***

18.626 g aniline was added to 200 ml, 1.0 M HCl. 57.04 g APS was dissolved in 103 ml water and added dropwise to the aniline solution. The reaction was performed after 3 hours under the ice water bath. The product was filtered and washed with deionized water and absolute ethanol. The filter cake was stirred in 200 ml, 20% aqueous ammonia for one day, washed again, and finally dried in the oven. The dried PANI powder was dissolved in NMP, forming a homogeneous PANI solution.

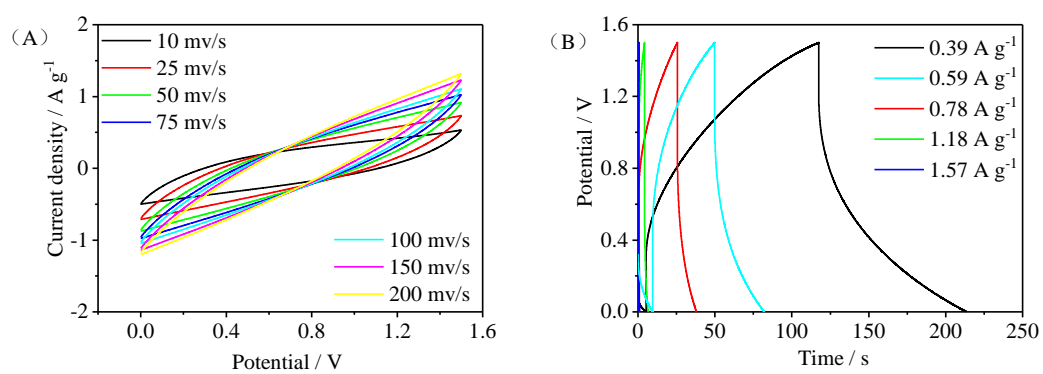

Fig. S1. The electrochemical performance of device 2. (A) The CV curves; (B) The GCD curves.

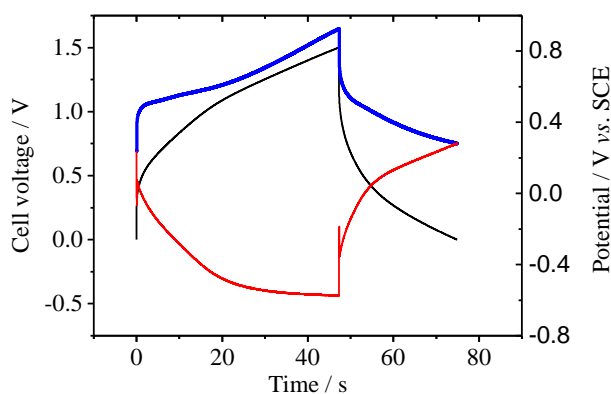

Fig. S2. GCD curves of single electrode of the device 1. Current density: anode,  $2.76 \text{ A g}^{-1}$ ; cathode,  $2 \text{ A g}^{-1}$ .

The electrode process of each electrode in device 1 during GCD was investigated in a three-electrode configuration system. The equilibrium potential of each electrode is approximately  $0.3 \text{ V vs. SCE}$ , which corresponds to the electrode potential of the first redox reaction of PANI. When the device is charged from  $0 \text{ V}$  to  $1.5 \text{ V}$ , the potential of the anode rises from  $0.3 \text{ V}$  to  $\sim 0.9 \text{ V vs. SCE}$ , and the potential of the cathode decreases from  $\sim 0.3 \text{ V}$  to  $\sim -0.6 \text{ V vs. SCE}$ . The capacitance of the cathode mainly derived from the electric double layer capacitance. But on the anode, PANI undergoes a reversible redox reaction, whose depolarization makes the anode potential change slowly during GCD, giving a large pseudocapacitance.

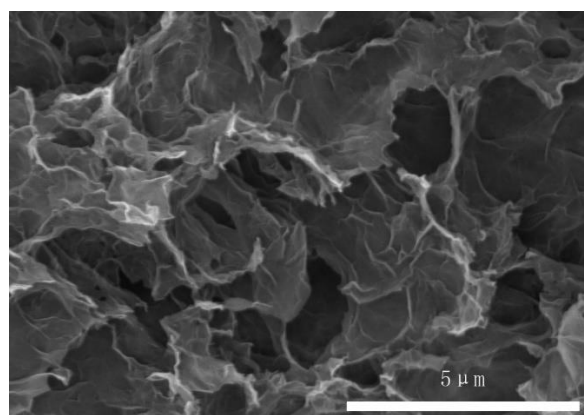

Fig. S3. SEM image of RGOH.

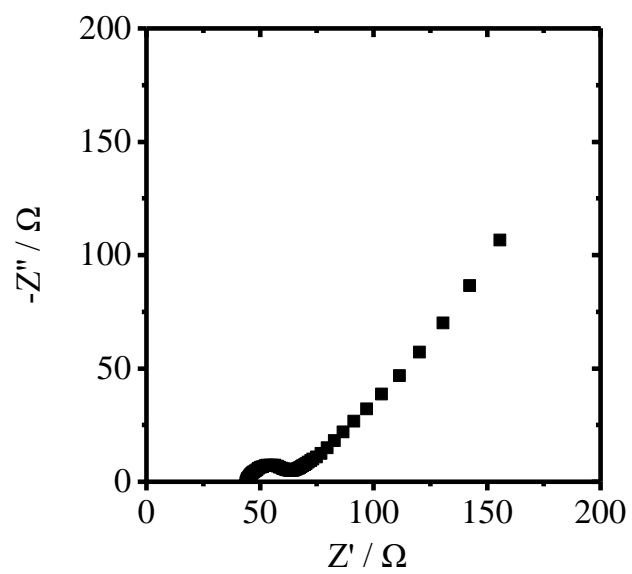

Fig. S4. Nyquist plot of Device 2.
